# Supplementary material
Source: PubMed Central journal article supplement (PMC4156711)
Supplement: 1407207111_pnas.201407207SI.pdf [file 1407207111_pnas.201407207SI.pdf]

# Supporting Information

Thomson et al. 10.1073/pnas.1407207111

## miRNA 1791

Gallus TGAAGCACCATGTTGGGCTGCATCAGTCATGCCATGTTATGAAACCTAACCGATGTGACTGATGCAGGCTGACGTGATGTGCTA  
Alligator TGAATGACCATGTTGGGCTGCCTCAGTCATGCCATGTTATGAAACCTAATGCAATGTGACTGATGCAGGCTGACGTGATGTGCTA  
Chrysemys TGAATGACCATGTTGGGCTGCATCAGTCATGCCATGTTATGAAACCTAACACGATGTGACTGATGCAGGCTGACATGACATGTGCTA

Gallus  $\Delta G = -40.60$   
U I A C U G G CCA UGA  
GA GCA CAUGU G CUGCAUCAUCAUG UGUUA \\  
CU UGU GUGCA C GACGUAGUCAGUGU GCAAU A  
A^ G A GU G AGC CCA

Alligator  $\Delta G = -37.20$   
U I C C UG G C CCAI U GAA  
GAUGCA CAUGU G CUGC UCAGUCAUG UGU AU A  
CUGUGU GUGCA C GAGC AGUCAGUGU ACG UA C  
A A GU G U A--^ - AUC

Chrysemys  $\Delta G = -38.30$   
U I CAC UG G CCA UGA  
GAUG CAUGU G CUGCAUCAUCAUG UGUUA \\  
CUGU GUACA C GACGUAGUCAGUGU ACAAU A  
A^ ACA GU G AGC CCA

## miRNA 1641

Gallus GATGCAGGGCATTCTCGAGGATTAATGACTGTCTGGGGTCATCATCTCTCCAGTAGTATTATTAATCCC-AGGAAACTCTGTGCCCTGATC  
Alligator AATGCAGGGCATTCTCGAGGATTAATGACTGTCTGGGGTCATCATCTCTCCAGTAGTATTATTAATCCC-AGGAAACTCTTATACCTTGATC  
Chrysemys GACGCAGGGCATTCTCGAGGATTAATGACTGTCTGGGGTCATCATCTCTCCAGTAGTATTATTAATCCCAGGAAACTCTGTGCCCTGATC

Gallus  $\Delta G = -47.80$   
GAU-----I C A U UCAUC  
GCAGGG AUUUCUUG GGAUUAUAGCUG CUGGGG \\  
UGUCUC UAAAGGAC CCAAUUAUUGAU GACCCU A  
CUAGUUCG^ A C U CCUCU

Alligator  $\Delta G = -48.40$   
AAUC-----I C U UCAUC  
AGGG AUUUCUUGGGAUUAUAGCUG CUGGGG \\  
UUUC UAAAGGACCCCAUUAUUGAU GACCCU A  
CUAGUUCGUA^ A U CCUCU

Chrysemys  $\Delta G = -49.60$   
A-----I G C U UCAUC  
CGCA GG AUUUCUUGGG AUUAUAGCUG CUGGGG \\  
GUGU UC UAAAGGACCC UGAUUAUUGAU GACCCU A  
CUAGUUCG^ G A C U CCUCU

## miRNA 1743

Gallus AAAGTAGGCTCCACTGTGTTAATCCTCTTGGAAATGCAGCAATTATCACCTACCATATAGGTGTTAAGTGTGAATTTCAAGGGATTATCACTTTCCCTCTT  
Alligator CAAGTGGTCTTATTGTGTAATCCTCTTGGAAATGCAGCAATTATCACCTACCATATAGGTGTTAAGTGTGAATTTCAAGGGATTATCACTTTCCCTCTT  
Chrysemys NNNNNNNNNCACTGTCTAATCCTCTTGGAAATGCAGCAATTATCACCTACCATATAGGTGTTAAGTGTGACTTTTCAAGGGATTATCACTTTCCCTCTT

Gallus  $\Delta G = -38.40$   
I U CUCCACU U UC G A U CC  
AAAG AGG GUG UAAUCC UUGGAU CAGCA UUA CACCUA \\  
UUUC UCC CAC AUUAGG AACUUUA GUCGU AAU GUGGAU A  
^ C UUU---- U GA A G U AU

Alligator  $\Delta G = -40.60$   
CI U UUCUUAU C UC G A U CC  
AAG GGG GUG UAAUCC UUGGAU CAGCA UUA CACCUA \\  
UUC CCC CAC AUUAGG AACUUUA GUCGU AAU GUGGAU A  
-^ C UUU---- U GA A G U AU

Chrysemys  $\Delta G = -34.20$   
NNNNNNNNNCAU I C UC UG A U CC  
GUG UAAUCC UUGGA CAGCA UUA CACCUA \\  
CAC AUUAGG AACUUU GUCGU AAU GUGGAU A  
UUUCCCCUUU--^ U GA CA G U AU

## miRNA 2964

Gallus AATCTCTGTACAGATGTCAGACACAATTCTGGTTCGTACGGCTCCAGCGCACAGAATTGCGTTTGGACAATCAGGAGCAGAGATT  
Alligator ACTCCCGCACAGATGTCAGACACAATTCTGGTTCGTACGGCTCCAGCGCACAGAATTGCGTTTGGACAATCAGGAGCGAGACT  
Chrysemys AATCTCTGTCACAGATGTCAGACACAATTCTGGTTCGTATGATTCCACTGCACAGAATTGCGTTTGGACAATCAGGAGCAGAGATT

Gallus  $\Delta G = -43.10$   
ACA -I A GUU ACGG  
AAUCUCUGCU GA UGUCCAGAC CAUUCUUG CGU \\  
UUAGAGACGA CU ACAGGUUUG GUUAAGAAC GCG C  
GGA A^ C AC- ACCU

Alligator  $\Delta G = -35.90$   
A--I CCG ACA - A GU ACG  
CUCC CC GAU GUCCAGAC CAUUCUUG UUGU U  
GAGG GG CUA CAGGUUUG GUUAAGAAC GGCA U  
UCA^ CGA A-- A C AC CCU

Chrysemys  $\Delta G = -39.70$   
CACCA -I A GUU - A  
AAUCUCUGC GA UGUCCAGAC CAUUCUUG UGUA UG U  
UUAGAGACG CU ACAGGUUUG GUUAAGAAC ACGU AC U  
AGGA A^ C --- U C

Fig. S1. Sequence alignment and predicted secondary structure for four microRNA families that were detected in the *Alligator* and *Chrysemys* genomes via BLAST similarity searches. The mature miRNA sequence from miRBase is underlined in the sequence and secondary structure of the reference species (*Gallus*). Substitutions relative to the reference sequence are highlighted in red. miRNA 1743 sits at the end of a contig in the *Chrysemys* genome assembly and is truncated by 10 bases on the 5' end as a result. We represent these as ambiguous bases and make no attempt to predict secondary structure in this region.
